# Supplementary material
Source: PubMed Central journal article supplement (PMC1402387)
Supplement: cmaj_174_6_787__1.pdf [file cmaj_174_6_787__1.pdf]

**Appendix 1: Sociodemographic characteristics and health status of survey respondents by ethnicity, in %\* of survey respondents**

| Characteristic          | White<br>n = 106 905 | Minority<br>n = 14 406 | p<br>value | Chinese<br>n = 4110 | Japanese/<br>Korean<br>n = 759 | South<br>Asian<br>n = 3447 | SE Asian/<br>Filipino<br>n = 2002 | Arab/<br>W Asian<br>n = 1045 | Black<br>n = 2155 | Latin<br>American<br>n = 886 |
|-------------------------|----------------------|------------------------|------------|---------------------|--------------------------------|----------------------------|-----------------------------------|------------------------------|-------------------|------------------------------|
| Age, mean, yr           | 42.8                 | 37.4                   | 0.001      | 38.7                | 40.3                           | 36.9                       | 36.3                              | 35.8                         | 36.7              | 35.7                         |
| Female                  | 50.9                 | 50.2                   | 0.14       | 48.1                | 51.6                           | 49.8                       | 52.0                              | 44.2                         | 54.7              | 53.1                         |
| Marital status          |                      |                        |            |                     |                                |                            |                                   |                              |                   |                              |
| Now married             | 49.5                 | 54.5                   | 0.001      | 56.7                | 54.9                           | 62.2                       | 53.6                              | 56.6                         | 39.9              | 48.9                         |
| Common-law              | 9.1                  | 2.3                    |            | 1.6                 | 2.6                            | 0.9                        | 2.4                               | 1.3                          | 4.9               | 6.0                          |
| Widowed                 | 5.4                  | 2.9                    |            | 2.8                 | 4.3                            | 3.1                        | 2.2                               | 2.5                          | 3.0               | 3.4                          |
| Separated               | 2.3                  | 2.2                    |            | 1.5                 | 1.0                            | 1.4                        | 2.0                               | 2.7                          | 4.5               | 4.5                          |
| Divorced                | 4.8                  | 2.6                    |            | 1.9                 | 2.8                            | 1.6                        | 1.7                               | 2.4                          | 5.3               | 5.0                          |
| Single                  | 28.9                 | 35.5                   |            | 35.5                | 34.4                           | 30.9                       | 38.1                              | 34.5                         | 42.4              | 32.2                         |
| Education               |                      |                        |            |                     |                                |                            |                                   |                              |                   |                              |
| Less than secondary     | 29.4                 | 26.2                   | 0.001      | 21.7                | 19.6                           | 29.6                       | 26.3                              | 26.0                         | 29.6              | 31.7                         |
| Secondary               | 26.9                 | 28.1                   |            | 32.0                | 30.7                           | 26.6                       | 23.8                              | 22.4                         | 27.3              | 31.6                         |
| Postsecondary           | 43.7                 | 45.7                   |            | 46.4                | 49.7                           | 43.8                       | 49.9                              | 51.6                         | 43.1              | 36.7                         |
| Income†                 | n = 96 832           | n = 12 613             |            | n = 3408            | n = 659                        | n = 3059                   | n = 1833                          | n = 883                      | n = 1950          | n = 822                      |
| \$30 000                | 21.3                 | 29.0                   | 0.001      | 22.4                | 23.5                           | 23.1                       | 20.6                              | 35.7                         | 32.8              | 31.0                         |
| \$30 000-\$49 999       | 20.1                 | 25.5                   |            | 20.3                | 19.4                           | 22.7                       | 23.4                              | 22.5                         | 23.4              | 26.7                         |
| \$50 000-\$79 999       | 25.4                 | 26.1                   |            | 20.7                | 23.9                           | 24.1                       | 29.0                              | 18.1                         | 20.9              | 24.2                         |
| \$80 000                | 23.8                 | 19.4                   |            | 19.6                | 19.9                           | 18.8                       | 18.7                              | 8.2                          | 13.4              | 10.7                         |
| Born in Canada          | 88.0                 | 19.1                   | 0.001      | 16.8                | 49.9                           | 16.4                       | 17.0                              | 10.2                         | 25.6              | 13.7                         |
| Residence in Canada     |                      |                        |            |                     |                                |                            |                                   |                              |                   |                              |
| 5 yr                    | 0.8                  | 11.6                   |            | 10.8                | 19.0                           | 13.5                       | 9.3                               | 20.2                         | 6.4               | 9.5                          |
| 5-9 yr                  | 0.9                  | 18.3                   |            | 21.7                | 8.5                            | 19.5                       | 20.9                              | 24.3                         | 10.2              | 13.6                         |
| 10 yr                   | 10.3                 | 50.9                   |            | 50.7                | 22.7                           | 50.6                       | 52.8                              | 45.4                         | 57.8              | 63.1                         |
| Speak English or French | 99.0                 | 86.8                   | 0.001      | 79.8                | 89.6                           | 86.4                       | 87.9                              | 88.0                         | 97.7              | 87.4                         |
| Self-perceived health   |                      |                        |            |                     |                                |                            |                                   |                              |                   |                              |
| Excellent               | 25.9                 | 26.3                   |            | 20.4                | 27.4                           | 27.0                       | 27.2                              | 29.5                         | 33.1              | 28.4                         |
| Very good               | 36.6                 | 33.5                   |            | 34.9                | 39.3                           | 32.6                       | 33.6                              | 31.7                         | 31.6              | 31.9                         |
| Good                    | 25.8                 | 30.3                   |            | 34.8                | 24.9                           | 29.4                       | 30.4                              | 30.8                         | 24.8              | 30.5                         |
| Fair                    | 8.8                  | 7.6                    | 0.001      | 8.7                 | 6.0                            | 7.4                        | 7.3                               | 4.7                          | 8.1               | 7.0                          |
| Poor                    | 2.9                  | 2.3                    |            | 1.3                 | 2.4                            | 3.7                        | 1.5                               | 3.2                          | 2.3               | 2.3                          |
| Chronic diseases, no.   |                      |                        |            |                     |                                |                            |                                   |                              |                   |                              |
| 0                       | 34.4                 | 49.7                   |            | 50.0                | 44.1                           | 53.0                       | 48.5                              | 50.5                         | 46.2              | 50.6                         |
| 1                       | 26.8                 | 26.9                   |            | 28.0                | 29.2                           | 24.3                       | 27.4                              | 26.4                         | 27.6              | 28.4                         |
| 2                       | 17.4                 | 12.8                   |            | 12.4                | 13.6                           | 12.3                       | 13.7                              | 14.2                         | 13.1              | 10.9                         |
| 3                       | 21.4                 | 10.6                   | 0.001      | 9.6                 | 13.2                           | 10.4                       | 10.5                              | 8.9                          | 13.2              | 10.1                         |

\*Unless otherwise indicated.

†Because of missing financial data, numbers of respondents vary for income characteristics only.
