# Supplementary material
Source: PubMed Central journal article supplement (PMC1402387)
Supplement: cmaj_174_6_787__2.pdf [file cmaj_174_6_787__2.pdf]

**Appendix 2: Health services utilization by ethnicity, in % of weighted numbers\* of survey respondents**

| Service                              | White<br><i>n</i> = 106 905 | Minority<br><i>n</i> = 14 406 | <i>p</i><br>value | Chinese<br><i>n</i> = 4110 | Japanese/<br>Korean<br><i>n</i> = 759 | S Asian<br><i>n</i> = 3447 | SE Asian/<br>Filipino<br><i>n</i> = 2002 | Arab/<br>W Asian<br><i>n</i> = 1045 | Black<br><i>n</i> = 2155 | Latin<br>American<br><i>n</i> = 886 |
|--------------------------------------|-----------------------------|-------------------------------|-------------------|----------------------------|---------------------------------------|----------------------------|------------------------------------------|-------------------------------------|--------------------------|-------------------------------------|
| General practitioner                 | 78.4                        | 78.4                          | 0.989             | 76.7                       | 70.0                                  | 83.6                       | 79.0                                     | 75.9                                | 78.8                     | 73.7                                |
| Specialist physician                 | 54.7                        | 48.3                          | 0.001             | 47.4                       | 46.3                                  | 47.0                       | 45.5                                     | 52.6                                | 53.4                     | 48.5                                |
| Hospital admission                   | 8.3                         | 5.5                           | 0.001             | 3.7                        | 4.4                                   | 5.0                        | 5.5                                      | 9.4                                 | 7.2                      | 8.1                                 |
| PSA blood test<br>(men aged 40 yr)   | <i>n</i> = 21 959<br>44.7   | <i>n</i> = 2038<br>30.4       | 0.001             | <i>n</i> = 651<br>28.4     | <i>n</i> = 134<br>39.0                | <i>n</i> = 524<br>29.2     | <i>n</i> = 257<br>31.1                   | <i>n</i> = 131<br>28.2              | <i>n</i> = 256<br>39.4   | <i>n</i> = 86<br>18.2               |
| Mammogram<br>(women aged 35 yr)      | <i>n</i> = 35 819<br>65.7   | <i>n</i> = 4066<br>53.8       | 0.001             | <i>n</i> = 1182<br>49.9    | <i>n</i> = 238<br>68.7                | <i>n</i> = 863<br>48.4     | <i>n</i> = 594<br>51.2                   | <i>n</i> = 236<br>58.9              | <i>n</i> = 646<br>60.6   | <i>n</i> = 264<br>60.4              |
| Pap smear test<br>(women aged 18 yr) | <i>n</i> = 49 897<br>88.4   | <i>n</i> = 6375<br>70.3       | 0.001             | <i>n</i> = 1762<br>65.1    | <i>n</i> = 348<br>73.6                | <i>n</i> = 1474<br>66.7    | <i>n</i> = 896<br>67.3                   | <i>n</i> = 386<br>67.0              | <i>n</i> = 1043<br>82.6  | <i>n</i> = 399<br>81.2              |

Note: PSA = prostate-specific antigen.

\*Numbers of respondents are weighted to obtain estimates representative of the ethnicity (according to Statistics Canada) of the Canadian population.
