# Supplementary material
Source: PubMed Central journal article supplement (PMC1402387)
Supplement: cmaj_174_6_787__3.pdf [file cmaj_174_6_787__3.pdf]

**Appendix 3: Comparison between responses from white people and from members of a visible minority about utilization of health services during the 12 months before the survey, by sociodemographic status**

| Characteristic                                    | Visited a physician; %* |             | Hospital admission |
|---------------------------------------------------|-------------------------|-------------|--------------------|
|                                                   | GP                      | Specialist  |                    |
| <b>Sex</b>                                        |                         |             |                    |
| Male                                              | $p = 0.011$             | $p = 0.001$ | $p = 0.001$        |
| White                                             | 72.2                    | 48.3        | 6.7                |
| Minority                                          | 73.6                    | 41.5        | 3.1                |
| Female                                            | $p = 0.005$             | $p = 0.001$ | $p = 0.001$        |
| White                                             | 84.4                    | 60.9        | 8.6                |
| Minority                                          | 83.1                    | 55.1        | 7.9                |
| <b>Age</b>                                        |                         |             |                    |
| 65 yr                                             | $p = 0.028$             | $p = 0.001$ | $p = 0.001$        |
| White                                             | 76.7                    | 52.0        | 7.1                |
| Minority                                          | 77.4                    | 47.2        | 5.1                |
| 65 yr                                             | $p = 0.029$             | $p = 0.001$ | $p = 0.001$        |
| White                                             | 88.7                    | 67.0        | 15.1               |
| Minority                                          | 90.9                    | 62.7        | 11.0               |
| <b>Income</b>                                     |                         |             |                    |
| \$50 000                                          | $p = 0.23$              | $p = 0.001$ | $p = 0.001$        |
| White                                             | 79.2                    | 54.7        | 10.7               |
| Minority                                          | 78.6                    | 46.2        | 6.7                |
| \$50 000                                          | $p = 0.23$              | $p = 0.001$ | $p = 0.001$        |
| White                                             | 77.8                    | 54.9        | 6.3                |
| Minority                                          | 78.5                    | 51.7        | 4.3                |
| Born in Canada                                    | $p = 0.001$             | $p = 0.013$ | $p = 0.001$        |
| White                                             | 78.2                    | 54.4        | 8.3                |
| Minority                                          | 75.0                    | 52.0        | 3.9                |
| <b>Length of stay in Canada since immigration</b> |                         |             |                    |
| 10 yr                                             | $p = 0.001$             | $p = 0.032$ | $p = 0.36$         |
| White                                             | 68.5                    | 43.9        | 5.5                |
| Minority                                          | 74.6                    | 40.9        | 4.3                |
| 10 yr                                             | $p = 0.93$              | $p = 0.001$ | $p = 0.001$        |
| White                                             | 81.8                    | 58.9        | 8.7                |
| Minority                                          | 81.9                    | 51.2        | 5.8                |
| <b>Able to speak an official language</b>         |                         |             |                    |
| English or French                                 | $p = 0.012$             | $p = 0.001$ | $p = 0.001$        |
| White                                             | 78.2                    | 54.7        | 8.2                |
| Minority                                          | 77.4                    | 48.9        | 5.3                |
| Neither                                           | $p = 0.001$             | $p = 0.001$ | $p = 0.001$        |
| White                                             | 77.1                    | 51.1        | 10.0               |
| Minority                                          | 84.7                    | 44.7        | 6.8                |

Note: GP = general practitioner.

\*Percentage of survey respondents, except where indicated as a  $p$  value.
