# Supplementary material
Source: PubMed Central journal article supplement (PMC1402387)
Supplement: cmaj_174_6_787__4.pdf [file cmaj_174_6_787__4.pdf]

**Appendix 4: Comparison between responses from white people and from members of a visible minority about utilization of cancer screening tests during the 12 months before the survey, by sociodemographic status, in %\* of respondents**

| Characteristic                                    | PSA test<br>(men 40 yr) | Mammogram<br>(women 35 yr) | Pap smear<br>(women 18 yr) |
|---------------------------------------------------|-------------------------|----------------------------|----------------------------|
| <b>Age</b>                                        |                         |                            |                            |
| 65 yr                                             | <i>p</i> 0.001          | <i>p</i> 0.001             | <i>p</i> 0.001             |
| White                                             | 37.3                    | 61.8                       | 90.3                       |
| Minority                                          | 25.9                    | 51.7                       | 71.0                       |
| 65 yr                                             | <i>p</i> 0.001          | <i>p</i> 0.001             | <i>p</i> 0.001             |
| White                                             | 67.0                    | 77.3                       | 79.9                       |
| Minority                                          | 52.9                    | 66.4                       | 62.8                       |
| <b>Income</b>                                     |                         |                            |                            |
| \$50 000                                          | <i>p</i> 0.001          | <i>p</i> 0.001             | <i>p</i> 0.001             |
| White                                             | 46.7                    | 68.2                       | 86.1                       |
| Minority                                          | 24.4                    | 51.1                       | 67.0                       |
| \$50 000                                          | <i>p</i> 0.001          | <i>p</i> 0.001             | <i>p</i> 0.001             |
| White                                             | 42.3                    | 61.8                       | 91.7                       |
| Minority                                          | 35.8                    | 57.2                       | 75.4                       |
| Born in Canada                                    | <i>p</i> = 0.33         | <i>p</i> = 0.038           | <i>p</i> 0.001             |
| White                                             | 43.8                    | 64.6                       | 88.9                       |
| Minority                                          | 40.6                    | 59.6                       | 65.7                       |
| <b>Length of stay in Canada since immigration</b> |                         |                            |                            |
| 10 yr                                             | <i>p</i> = 0.06         | <i>p</i> = 0.004           | <i>p</i> 0.001             |
| White                                             | 17.4                    | 47.9                       | 71.1                       |
| Minority                                          | 22.9                    | 39.3                       | 56.1                       |
| 10 yr                                             | <i>p</i> 0.001          | <i>p</i> 0.001             | <i>p</i> 0.001             |
| White                                             | 51.1                    | 73.9                       | 87.1                       |
| Minority                                          | 31.7                    | 57.7                       | 78.7                       |
| <b>Able to speak an official language</b>         |                         |                            |                            |
| English or French                                 | <i>p</i> 0.001          | <i>p</i> 0.001             | <i>p</i> 0.001             |
| White                                             | 44.8                    | 65.8                       | 88.6                       |
| Minority                                          | 29.3                    | 54.0                       | 70.8                       |
| Neither                                           | <i>p</i> 0.72           | <i>p</i> 0.001             | <i>p</i> 0.88              |
| White                                             | 36.8                    | 62.7                       | 67.8                       |
| Minority                                          | 35.6                    | 53.1                       | 67.5                       |

\*Percentage of survey respondents, except where indicated as a *p* value.
